# Supplementary material for: Diet Quality and Mortality among Chinese Adults: Findings from the China Health and Nutrition Survey
Source: MDPI journal article supplement (doi:10.3390/nu16010094), 2023-12-27
Supplement: s1 [file s1]

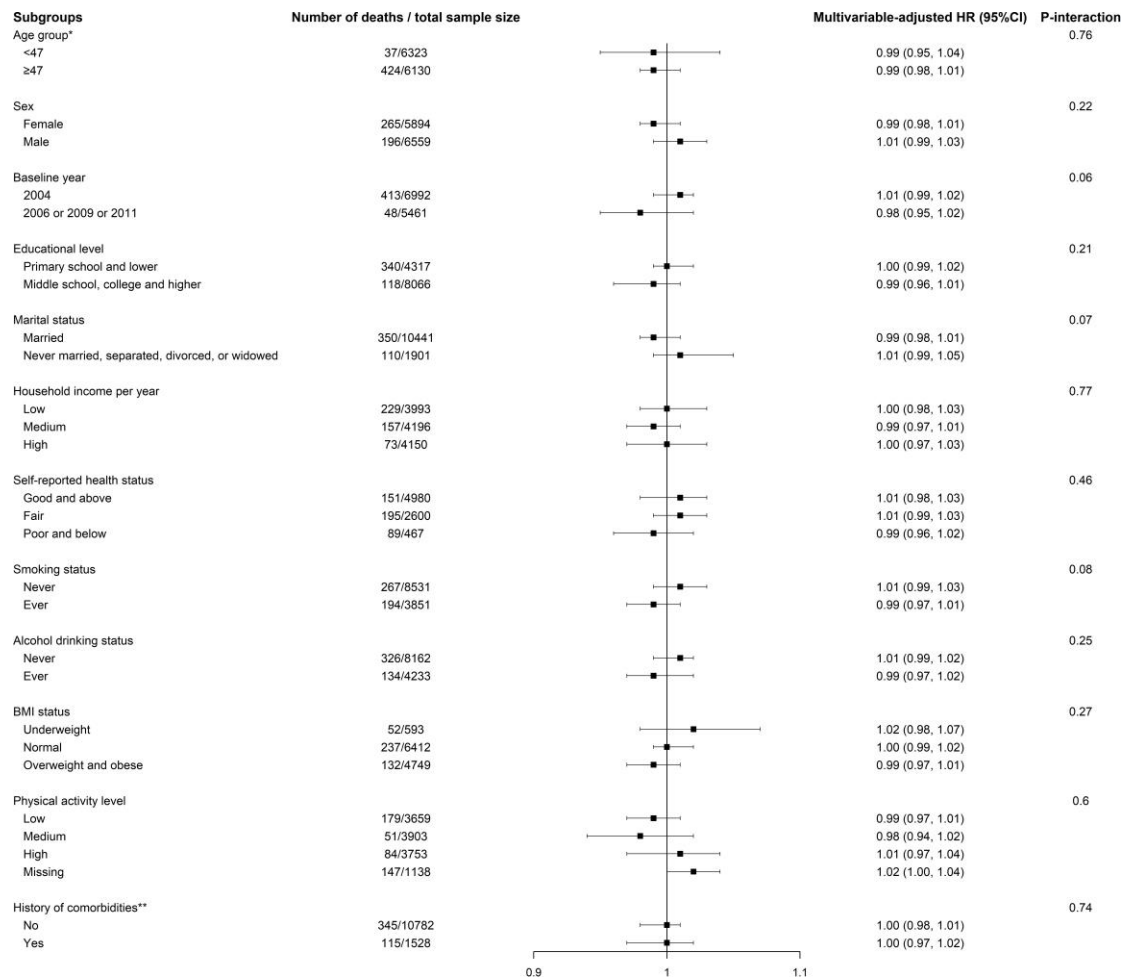

**Figure S1. Forest plot of the stratified associations between continuous DQI-I score and risk of all-cause mortality by selected covariates**

Abbreviations: BMI, body mass index; CI: confidence interval; DQI-I: Dietary Quality Index-International; HR: hazard ratio.

The multivariable-adjusted model adjusted for age, sex, baseline year, educational level, marriage status, household income, total energy intake, smoking status, drinking status, body mass index, physical activity level, and history of comorbidities.

\*The cutoff point was set based on median age.

\*\*Chronic diseases included hypertension, diabetes, myocardial infarction and stroke (cancer was not included due to majority of missing information).

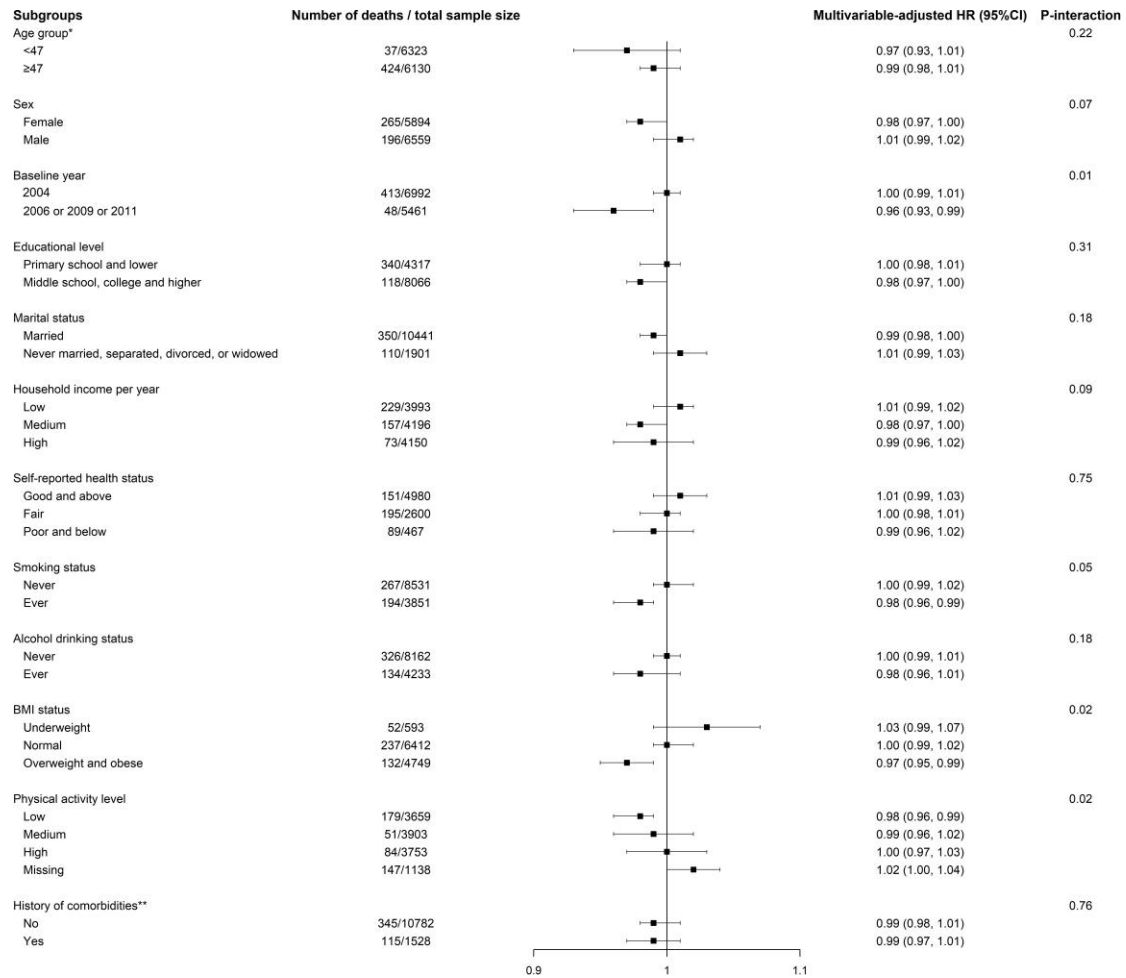

**Figure S2. Forest plot of the stratified associations between continuous CHEI score and risk of all-cause mortality by selected covariates**

Abbreviations: BMI, body mass index; CHEI, Chinese Health Eating Index; CI: confidence interval; HR: hazard ratio.

The multivariable-adjusted model adjusted for age, sex, baseline year, educational level, marriage status, household income, total energy intake, smoking status, drinking status, body mass index, physical activity level, and history of comorbidities.

\*The cutoff point was set based on median age.

\*\*Chronic diseases included hypertension, diabetes, myocardial infarction and stroke (cancer was not included due to majority of missing information).

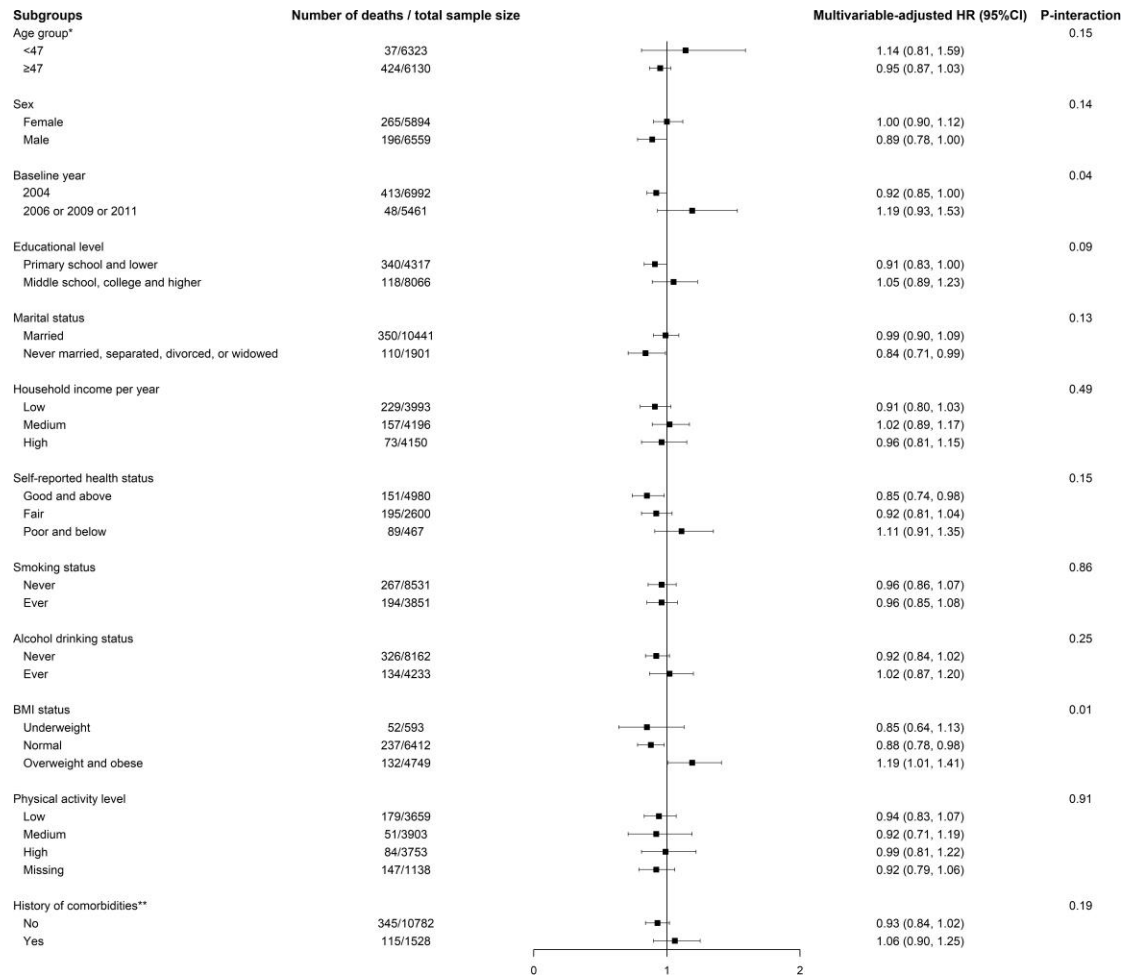

**Figure S3. Forest plot of the stratified associations between continuous E-DII score and risk of all-cause mortality by selected covariates**

Abbreviations: BMI, body mass index; CI: confidence interval; E-DII: energy adjusted-Dietary Inflammatory Index; HR: hazard ratio.

The multivariable-adjusted model adjusted for age, sex, baseline year, educational level, marriage status, household income, total energy intake, smoking status, drinking status, body mass index, physical activity level, and history of comorbidities.

\*The cutoff point was set based on median age.

\*\*Chronic diseases included hypertension, diabetes, myocardial infarction and stroke (cancer was not included due to majority of missing information).
